# Supplementary material for: A carbon-quantum-dot-hybridized NiOx hole-transport layer enables efficient and stable planar p–i–n perovskite solar cells with high open-circuit voltage
Source: Royal Society of Chemistry journal article supplement (doi:10.1039/d1tc02595c), 2021-01-01
Supplement: d1tc02595c1.pdf [file d1tc02595c1.pdf]

**Carbon-Quantum-Dot-Hybridized NiO<sub>x</sub> Hole-Transport Layer Enables Efficient and Stable Planar p-i-n Perovskite Solar Cells with High Open-Circuit Voltage**

Xuefeng Xia<sup>1</sup>, Dan Zhang<sup>1</sup>, Xiaofeng Wang<sup>1</sup>, Zonghu Xiao<sup>2</sup>, Fan Li\*<sup>1</sup>

<sup>1</sup>Department of Materials Science and Engineering, Nanchang University, 999 Xuefu Avenue, Nanchang 330031, China

<sup>2</sup>Jiangxi Key Laboratory of Advanced Materials and Applications for Solar Cells, Xinyu University, Xinyu 338004, China

**Author Information**

**Corresponding Author**

Fan Li, E-mail: [lfan@ncu.edu.cn](mailto:lfan@ncu.edu.cn)

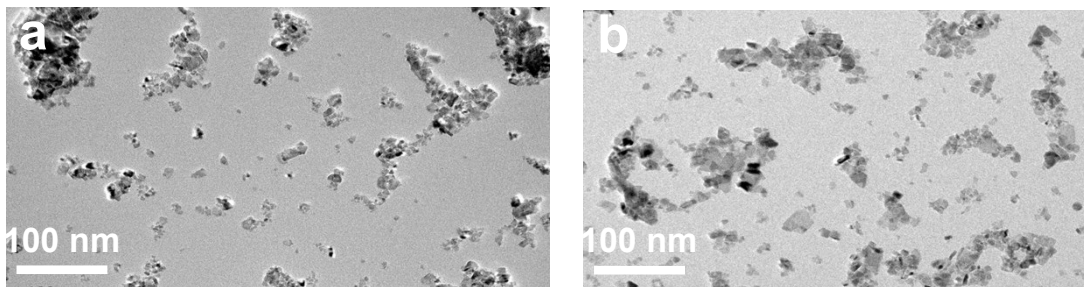

**Figure S1.** TEM images of a) the pristine NiO<sub>x</sub> and b) CQDs-hybridized NiO<sub>x</sub> dispersed in deionized water.

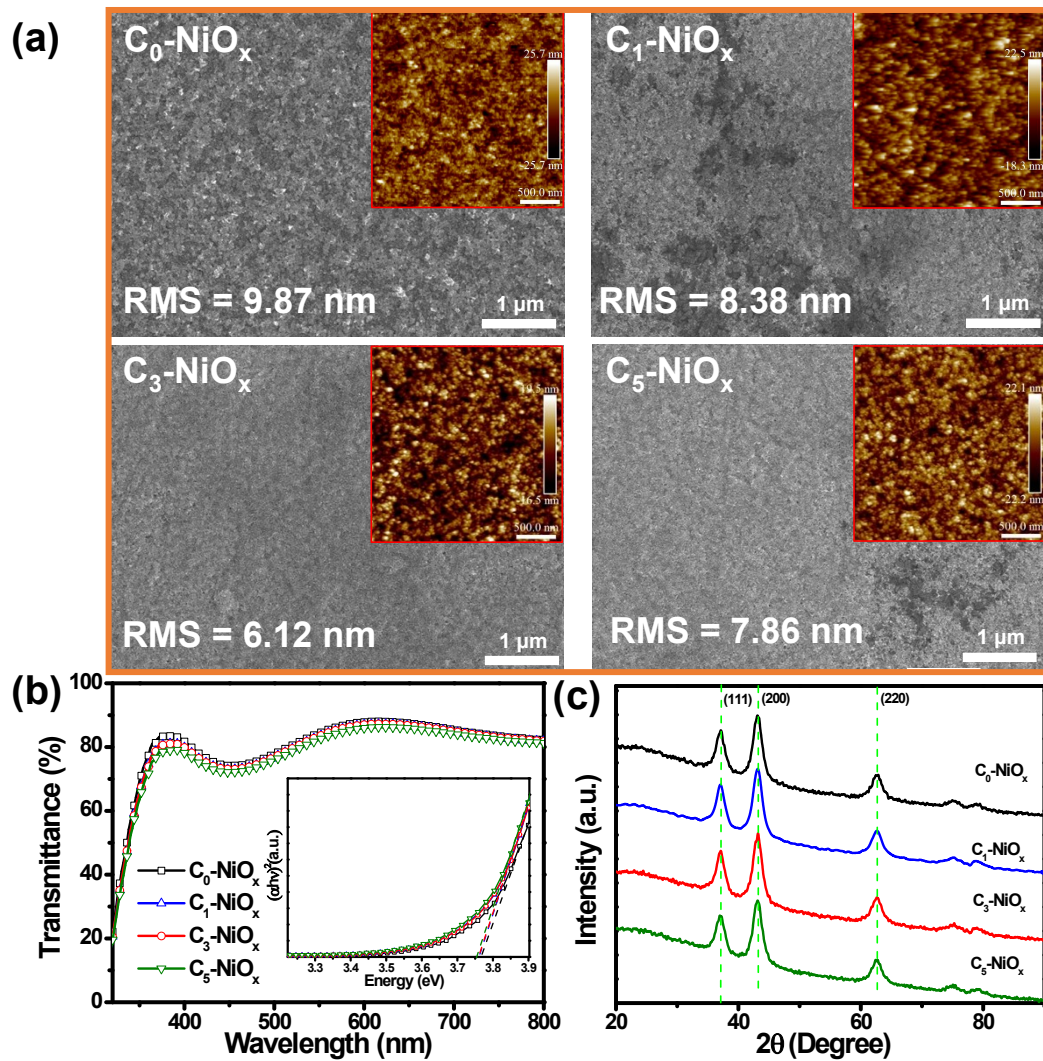

**Figure S2.** (a) FE-SEM and AFM (inset) images, (b) Optical transmittance (Inset: the corresponding Tauc plot of each film) and (c) X-ray diffraction spectra of the C<sub>0</sub>-NiO<sub>x</sub>, C<sub>1</sub>-NiO<sub>x</sub>, C<sub>3</sub>-NiO<sub>x</sub> and C<sub>5</sub>-NiO<sub>x</sub> films prepared on quartz substrates.

**Table S1. Performance of the reported inverted planar MAPbI<sub>3</sub> PSCs based on NiO<sub>x</sub> HTLs**

| Device configuration                                                                     | $V_{oc}$<br>(V) | $J_{sc}$<br>(mA<br>cm <sup>-2</sup> ) | $FF$ | PCE   | Method        | HTL                      | Ref  |
|------------------------------------------------------------------------------------------|-----------------|---------------------------------------|------|-------|---------------|--------------------------|------|
| ITO/Cu:NiO <sub>x</sub> /MAPbI <sub>3</sub> /PC <sub>61</sub> BM/bis-C <sub>60</sub> /Ag | 1.11            | 19.01                                 | 0.73 | 15.40 | sol-gel       | Cu:NiO <sub>x</sub>      | [1]  |
| ITO/Cu:NiO <sub>x</sub> /MAPbI <sub>3</sub> /C <sub>60</sub> /bis-C <sub>60</sub> /Ag    | 1.05            | 20.53                                 | 0.72 | 15.52 | combustion    | Cu: NiO <sub>x</sub>     | [2]  |
| ITO/Cu:NiO <sub>x</sub> /MAPbI <sub>3</sub> /C <sub>60</sub> /BCP/Ag                     | 1.12            | 22.28                                 | 0.81 | 20.26 | NP ink        | Cu: NiO <sub>x</sub>     | [3]  |
| ITO/Cu:NiO <sub>x</sub> /Cysteine/MAPbI <sub>3</sub> /PCBM/Bphen/Al                      | 1.11            | 23.60                                 | 0.70 | 18.30 | combustion    | Cu: NiO <sub>x</sub>     | [4]  |
| FTO/Cu:NiO <sub>x</sub> /MAPbI <sub>3</sub> /PCBM /Ag                                    | 1.06            | 20.79                                 | 0.67 | 14.88 | DCMS          | Cu: NiO <sub>x</sub>     | [5]  |
| ITO/Ag:NiO <sub>x</sub> /MAPbI <sub>3</sub> /PC <sub>71</sub> BM/BCP /Ag                 | 1.08            | 19.70                                 | 0.80 | 16.86 | sol-gel       | Ag: NiO <sub>x</sub>     | [6]  |
| ITO/Co:NiO <sub>x</sub> /MAPbI <sub>3</sub> /PCBM/PEI/Ag                                 | 1.05            | 22.30                                 | 0.79 | 18.60 | combustion    | Co: NiO <sub>x</sub>     | [7]  |
| FTO/Zn:NiO <sub>x</sub> /MAPbI <sub>3</sub> /PCBM/BCP/Ag                                 | 1.10            | 22.80                                 | 0.78 | 19.6  | sol-gel       | Zn: NiO <sub>x</sub>     | [8]  |
| FTO/LiNiO/MAPbI <sub>3</sub> -xCl <sub>x</sub> /PCBM/Ag                                  | 1.12            | 21.79                                 | 0.74 | 18.00 | magnetron     | Li: NiO <sub>x</sub>     | [9]  |
| FTO/NiMgO <sub>x</sub> /MAPbI <sub>3</sub> /PCBM/ZnMgO/Al                                | 1.08            | 21.30                                 | 0.80 | 18.50 | sol-gel       | NiMgO                    | [10] |
| FTO/ Sr:NiO <sub>x</sub> /MAPbI <sub>3</sub> /PCBM/AgAl                                  | 1.11            | 22.73                                 | 0.79 | 20.05 | sol-gel       | Sr:NiO <sub>x</sub>      | [11] |
| TO/Cs:NiO <sub>x</sub> /MAPbI <sub>3</sub> /PCBM/ZrAcac/Ag                               | 1.12            | 21.77                                 | 0.79 | 19.35 | sol-gel       | Cs: NiO <sub>x</sub>     | [12] |
| ITO/Li, Ag:NiO <sub>x</sub> /MAPbI <sub>3</sub> /PCBM/BCP/Ag                             | 1.13            | 21.29                                 | 0.80 | 19.24 | sol-gel       | Li,Ag: NiO <sub>x</sub>  | [13] |
| FTO/La:NiO <sub>x</sub> /MAPbI <sub>3</sub> /PCBM/BCP/Ag                                 | 1.01            | 21.02                                 | 0.73 | 15.46 | NP ink        | La: NiO <sub>x</sub>     | [14] |
| ITO/Fe:NiO <sub>x</sub> /MAPbI <sub>3</sub> /PCBM/BCP/Ag                                 | 1.08            | 19.10                                 | 0.84 | 17.40 | spray coating | Fe: NiO <sub>x</sub>     | [15] |
| FTO/NiO <sub>x</sub> /MAPbI <sub>3</sub> /PCBM/Ag                                        | 1.03            | 17.42                                 | 0.71 | 12.70 | sol-gel       | NiO <sub>x</sub>         | [16] |
| ITO/NiO <sub>x</sub> (F4-TCNQ)/MAPbI <sub>3</sub> /PCBM/BCP/Ag                           | 1.02            | 20.70                                 | 0.74 | 15.70 | sol-gel       | F4-TCNQ:NiO <sub>x</sub> | [17] |
| FTO/S:NiO <sub>x</sub> /MAPbI <sub>3</sub> /PCBM/PPDIN6/Ag                               | 1.10            | 23.28                                 | 0.80 | 20.43 | spray coating | S: NiO <sub>x</sub>      | [18] |
| FTO/NiO <sub>x</sub> /MAPbI <sub>3</sub> /PCBM/Ag                                        | 1.01            | 18.30                                 | 0.81 | 14.95 | EBPVD         | NiO <sub>x</sub>         | [19] |
| FTO NiO <sub>x</sub> /MAPbI <sub>3</sub> /C <sub>60</sub> /SnO <sub>2</sub> NCs/Ag       | 1.12            | 21.8                                  | 0.77 | 18.80 | sol-gel       | NiO <sub>x</sub>         | [20] |
| ITO/NiO/MAPbI <sub>3</sub> /PCBM/PDINO/Ag                                                | 1.11            | 20.57                                 | 0.76 | 17.50 | NP ink        | NiO <sub>x</sub>         | [21] |

**Reference:**

[1] J.H. Kim, P.W. Liang, S.T. Williams, N. Cho, C.C. Chueh, M.S. Glaz, D.S. Ginger, A.K. Jen, Adv. Mater. 27 (2015) 695-701.

[2] J.W. Jung, C.C. Chueh, A.K. Jen, A Low-Temperature, Solution-Processable, Adv. Mater. 27 (2015) 7874-7880.

- [3] W. Chen, Y. Wu, J. Fan, A.B. Djurišić, F. Liu, H.W. Tam, A. Ng, C. Surya, W.K. Chan, D. Wang, *Adv. Energy Mater.* 8 (2018) 1703519.
- [4] J. He, Y. Xiang, F. Zhang, J. Lian, R. Hu, P. Zeng, J. Song, J. Qu, *Nano Energy* 45 (2018) 471-479.
- [5] A. Huang, L. Lei, Y. Chen, Y. Yu, Y. Zhou, Y. Liu, S. Yang, S. Bao, R. Li, P. Jin, *Sol. Energy Mater. Sol. Cells.* 182 (2018) 128-135.
- [6] Y. Wei, K. Yao, X. Wang, Y. Jiang, X. Liu, N. Zhou, F. Li, *Appl. Surf. Sci.* 427 (2018) 782-790.
- [7] Y. Xie, K. Lu, J. Duan, Y. Jiang, L. Hu, T. Liu, Y. Zhou, B. Hu, *ACS Appl. Mater. Interfaces* 10 (2018) 14153-14159.
- [8] X. Wan, Y. Jiang, Z. Qiu, H. Zhang, X. Zhu, S. Iqbal, X. Liu, C. Xin, B. Cao, *ACS Appl. Energy Mater.* (2018) acsaem.8b00671-.
- [9] W. Nie, H. Tsai, J.-C. Blancon, F. Liu, C.C. Stoumpos, B. Traore, M. Kepenekian, O. Durand, C. Katan, S. Tretiak, *Adv. Mater.* 30 (2018) 1703879.
- [10] G. Li, Y. Jiang, S. Deng, A. Tam, P. Xu, M. Wong, H.S. Kwok, *Adv. Sci.* (2017) 1700463.
- [11] J. Zhang, W. Mao, X. Hou, J. Duan, J. Zhou, S. Huang, W. Ou-Yang, X. Zhang, Z. Sun, X. Chen, *Sol. Energy* 174 (2018) 1133-1141.
- [12] W. Chen, F.Z. Liu, X.Y. Feng, A.B. Djurišić, W.K. Chan, Z.B. He, *Adv. Energy Mater.* 7 (2017) 1700722.
- [13] X. Xia, Y. Jiang, Q. Wan, X. Wang, L. Wang, F. Li, *ACS Appl. Mater. Interfaces* 10 (2018) 44501-44510.
- [14] S. Teo, Z. Guo, Z. Xu, C. Zhang, Y. Kamata, S. Hayase, T. Ma, *ChemSusChem* 12 (2019) 518-526.
- [15] P. Chandrasekhar, Y.-H. Seo, Y.-J. Noh, S.-I. Na, *Appl. Surf. Sci.* 481 (2019) 588-596.
- [16] Y. Qin, J. Song, Q. Qiu, Y. Liu, Y. Zhao, L. Zhu, Y. Qiang, *J. Alloys Compounds* 810 (2019) 151970.
- [17] S. Zhao, J. Zhuang, X. Liu, H. Zhang, R. Zheng, X. Peng, X. Gong, H. Guo, H. Wang, H. Li, *Mater. Sci. Semicon. Proc.* 121 (2021) 105458.

- [18] C. Hu, Y. Bai, S. Xiao, K. Tao, W.K. Ng, K.S. Wong, S.H. Cheung, S.K. So, Q. Chen, S. Yang, *Solar RRL* 4 (2020) 2000270.
- [19] M.I. Hossain, A.K.M. Hasan, W. Qarony, M. Shahiduzzaman, M.A. Islam, Y. Ishikawa, Y. Uraoka, N. Amin, D. Knipp, M. Akhtaruzzaman, Y.H. Tsang, *Small Methods* 4 (2020) 2000454.
- [20] Z. Zhu, Y. Bai, X. Liu, C.C. Chueh, S. Yang, A.K.Y. Jen, *Adv. Mater.* 28 (2016) 6478-6484.
- [21] Y. Hou, W. Chen, D. Baran, T. Stubhan, N.A. Luechinger, B. Hartmeier, M. Richter, J. Min, S. Chen, C.O.R. Quiroz, *Adv. Mater.* 28 (2016) 5112-5120.

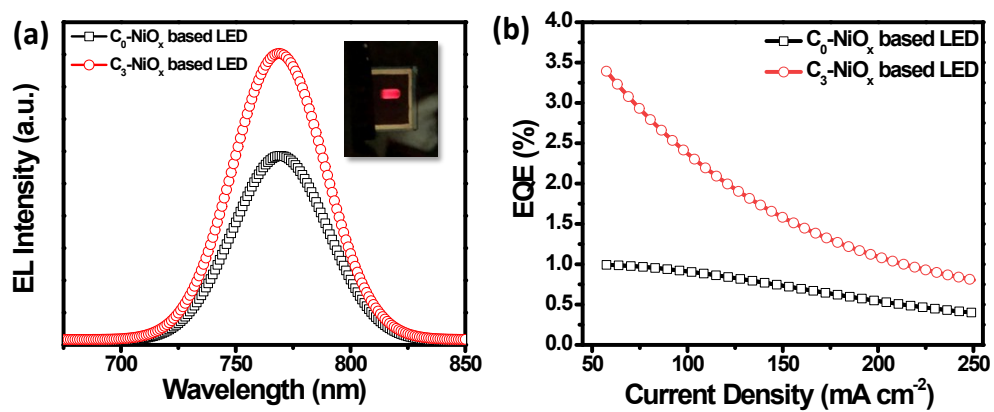

**Figure S3.** a) The electroluminescence spectra (EL) and b) EQE-current density curves for the best-performing  $C_0$ -NiO<sub>x</sub> and  $C_3$ -NiO<sub>x</sub> devices operating as LEDs (Insert: EL image of the  $C_3$ -NiO<sub>x</sub> device).

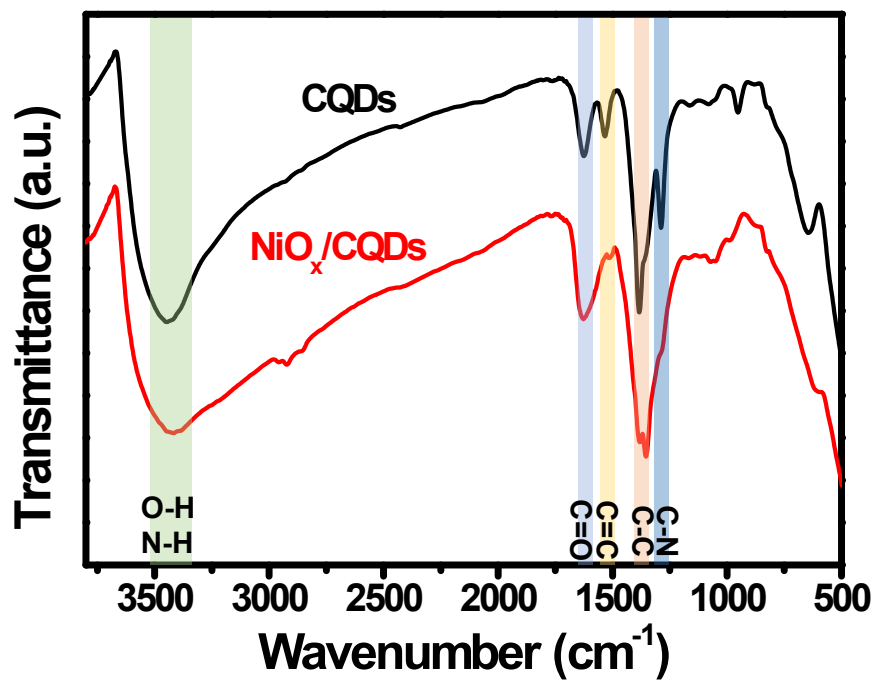

Figure S4. FT-IR spectra of the CQDs and CQDs-hybridized  $\text{NiO}_x$  films.



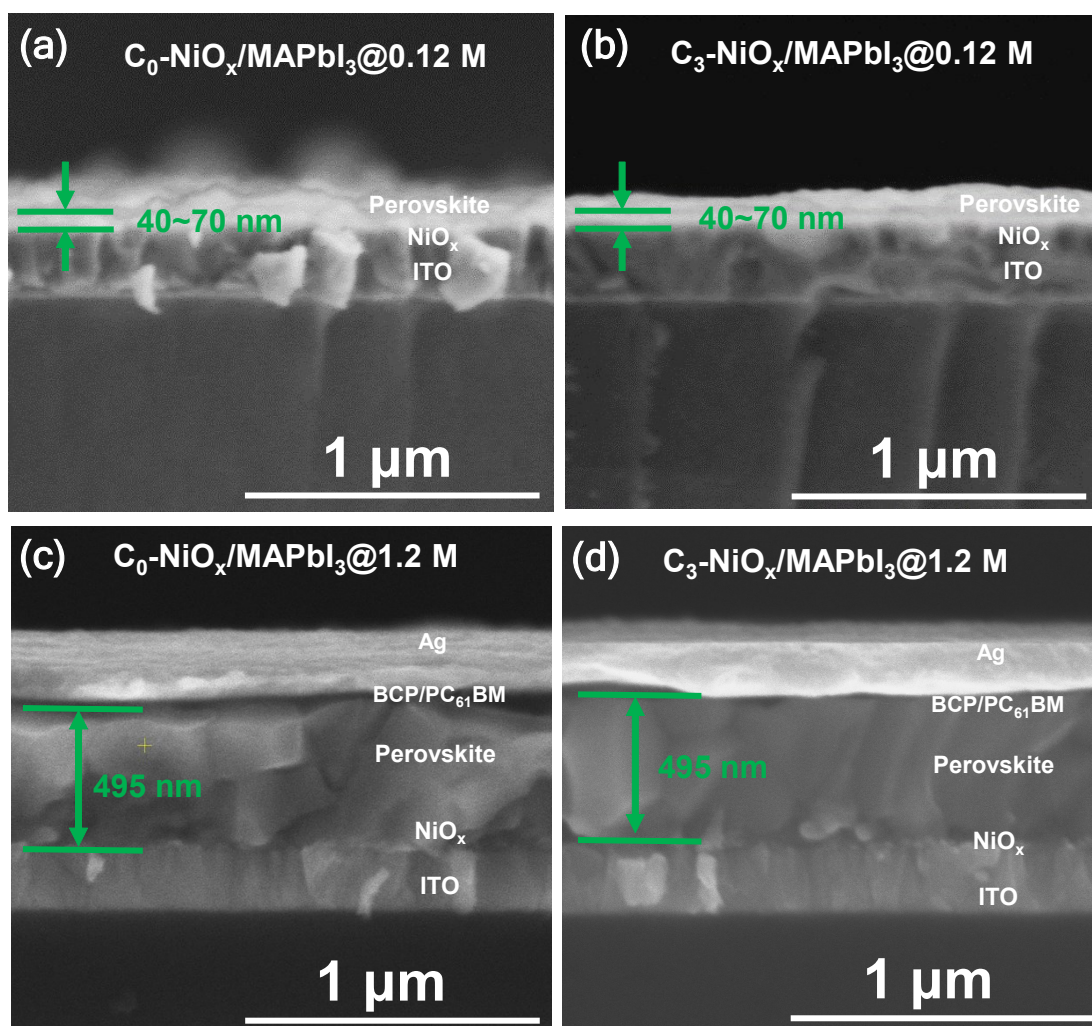

**Figure S5.** The cross-sectional SEM images of (a, b) thin perovskite films (casting from 0.12 M perovskite precursor solution) on  $C_0$ -NiO<sub>x</sub> and  $C_3$ -NiO<sub>x</sub> films, respectively, and (c, d) thick perovskite films (casting from 1.2 M perovskite precursor solution) on  $C_0$ -NiO<sub>x</sub> and  $C_3$ -NiO<sub>x</sub> films, respectively.

**Table S2.** XRD parameters of thin and thick perovskite films on C<sub>0</sub>-NiO<sub>x</sub> and C<sub>3</sub>-NiO<sub>x</sub> HTLs

| Concentrations | Samples                          | FWHM of (110)<br>(degree) | Intensity ratio of<br>(110) to (310) |
|----------------|----------------------------------|---------------------------|--------------------------------------|
| 0.12 M         | C <sub>0</sub> -NiO <sub>x</sub> | 0.38                      | 1.73                                 |
|                | C <sub>3</sub> -NiO <sub>x</sub> | 0.27                      | 8.31                                 |
| 1.20 M         | C <sub>0</sub> -NiO <sub>x</sub> | 0.17                      | 3.78                                 |
|                | C <sub>3</sub> -NiO <sub>x</sub> | 0.12                      | 4.76                                 |

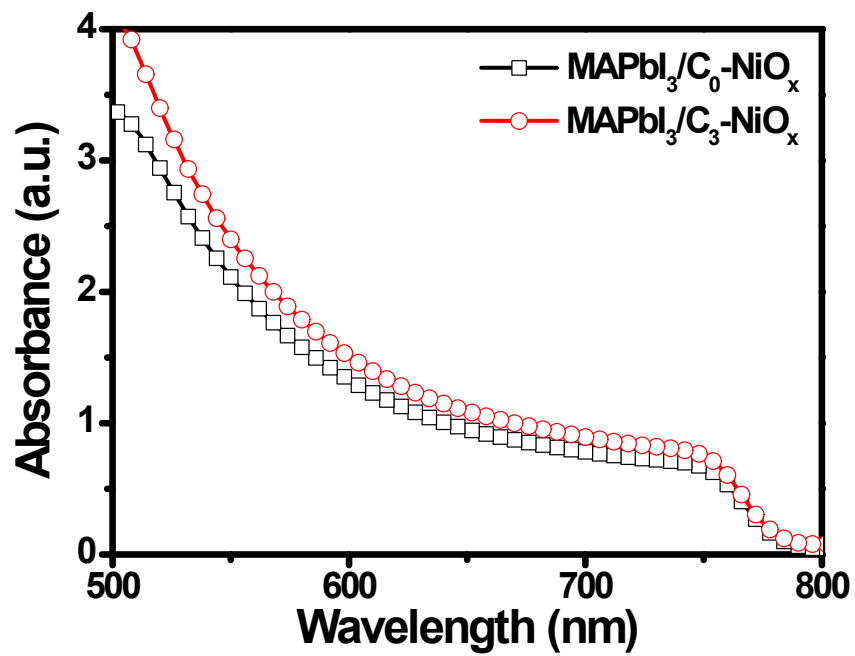

**Figure S6.** UV-vis absorption spectra of thick MAPbI<sub>3</sub> films deposited on the C<sub>0</sub>-NiO<sub>x</sub> and C<sub>3</sub>-NiO<sub>x</sub> films.

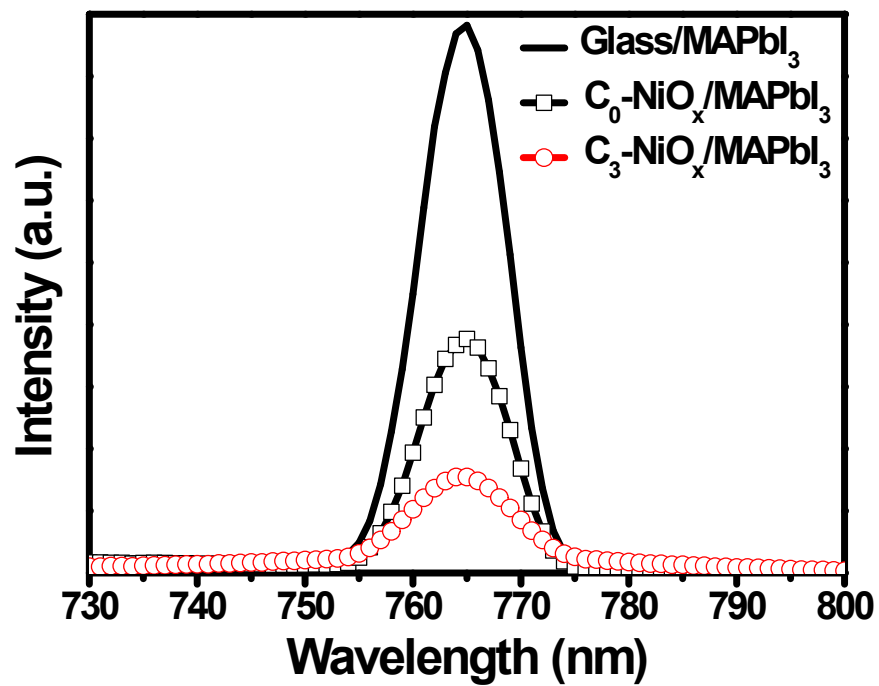

**Figure S7.** Steady-state PL spectra of MAPbI<sub>3</sub> perovskite films deposited on the glass, C<sub>0</sub>-NiO<sub>x</sub> and C<sub>3</sub>-NiO<sub>x</sub> films.
